# Supplementary material
Source: publisher figshare collection journal article supplement (https://frontiersin.figshare.com/ndownloader/files/26312035)
Supplement: Supplementary file 1 [file 26312035]

## Sheet: Sheet1
project	code	site	station	trawl	date	station.month	gear	area	environment	depth.m	lat	lon	salinity	o2	temp0	temp300	chloro
C22	C22.S21.A	D.2	1	21	22-10-2016	10-1	A	D	Island	150	-26.379	-79.8893	34.3056	208.203	18.4096	9.82058	0.177224
C22	C22.S20.A	D.2	2	20	22-10-2016	10-2	A	D	Island	130	-26.3283	-79.8904	34.3926	225.856	18.4096	9.82058	0.178287
C22	C22.S22.A	D.1	3	22	23-10-2016	10-3	A	D	Island	340	-26.334	-80.093	34.5335	56.7434	18.4096	9.82058	0.176477
C22	C22.S17.A	D.1	4	17	23-10-2016	10-4	A	D	Island	130	-26.26	-80.103	34.3926	225.856	18.4096	9.82058	0.177746
C22	C22.SSF9.A	SGR.5	5	SF9	27-10-2016	10-5	A	SGR	seamount	200	-25.7774	-83.3163	34.2641	198.919	19.3798	9.97909	0.13948
C22	C22.SSF8.A	SGR.5	6	SF8	27-10-2016	10-6	A	SGR	seamount	285	-25.7166	-83.0116	34.4519	85.7251	19.3076	9.98328	0.142336
C22	C22.SSF6.A	SGR.6	7	SF6	28-10-2016	10-7	A	SGR	seamount	175	-25.5535	-82.3963	34.329	196.086	19.1306	9.97622	0.147346
C22	C22.SSF7.A	SGR.6	8	SF7	28-10-2016	10-8	A	SGR	seamount	175	-25.6557	-82.4742	34.329	196.086	19.1306	9.97622	0.146327
C22	C22.SSFX.A	SGR.8	9	SFX	31-10-2016	10-9	A	SGR	seamount	230	-25.0792	-82.0067	34.4196	115.554	19.0584	10.0074	0.154974
C22	C22.SSF5.A	SGR.7	10	SF5	01-11-2016	11-10	A	SGR	seamount	180	-25.4272	-81.8806	34.3445	180.86	18.9029	9.9929	0.153163
C22	C22.S31.A	JF.3	11	31	05-11-2016	11-11	A	JF	Island	160	-33.8046	-80.857	34.0027	219.422	17.4959	8.60384	0.17545
C22	C22.JF1.A	JF.2	12	JFI	10-11-2016	11-12	A	JF	seamount	370	-33.6067	-78.5071	34.4219	91.4836	16.779	8.92956	0.184822
C22	C22.JF1B.A	JF.2	13	JFIB	10-11-2016	13-11	A	JF	seamount	370	-33.6302	-78.4804	34.4219	91.4836	16.779	8.92956	0.184121
C22	C22.JF2.A	JF.2	14	JF2	11-11-2016	14-11	A	JF	seamount	350	-33.5883	-77.7121	34.4463	77.1272	16.5856	8.91582	0.187487
C22	C22.S18.RV	D.1	15	18	23-10-2016	15-10	RV	D	Island	50	-26.3039	-80.0644	34.7134	244.614	18.4096	9.82058	0.181928
C22	C22.S21.RV	D.2	16	21	22-10-2016	16-10	RV	D	Island	150	-26.379	-79.8893	34.3056	208.203	18.4096	9.82058	0.177224
C22	C22.S22.RV	D.1	17	22	23-10-2016	17-10	RV	D	Island	350	-26.3344	-80.0105	34.5267	59.3841	18.4096	9.82058	0.177656
C22	C22.SSF9.RV	SGR.5	18	SF9	27-10-2016	18-10	RV	SGR	seamount	203	-25.779	-83.3187	34.2625	196.366	19.3798	9.97909	0.13948
C22	C22.SSF8.RV	SGR.5	19	SF8	27-10-2016	19-10	RV	SGR	seamount	250	-25.7169	-83.0123	34.3599	126.171	19.3076	9.98328	0.142336
C22	C22.SSF7.RV	SGR.6	20	SF7	28-10-2016	20-10	RV	SGR	seamount	170	-25.6562	-82.4732	34.3518	201.027	19.1306	9.97622	0.146327
C22	C22.SSF2.RV	SGR.9	21	SF2	31-10-2016	21-10	RV	SGR	seamount	280	-24.7424	-82.5226	34.5065	71.0096	19.434	10.0116	0.154024
C22	C22.SSFX.RV	SGR.8	22	SFX	31-10-2016	22-10	RV	SGR	seamount	220	-25.0806	-82.0052	34.3982	128.5	19.0584	10.0074	0.154974
C22	C22.S20.RV	D.2	23	20	22-10-2016	23-10	RV	D	Island	130	-26.329	-79.8885	34.3926	225.856	18.4096	9.82058	0.178287
C22	C22.S17.RV	D.1	24	17	23-10-2016	24-10	RV	D	Island	133	-26.2606	-80.105	34.3751	223.597	18.4096	9.82058	0.177746
C22	C22.SSF6.RV	SGR.6	25	SF6	28-10-2016	25-10	RV	SGR	seamount	176	-25.5531	-82.3965	34.3253	195.08	19.1306	9.97622	0.147346
Rusian	Rusian.1A	MS.1	26	1A	06-05-1987	26-5	T	MS	seamount	282	-25.2017	-100.823	34.6269	197.33	22.3661	12.8477	0.022163
Rusian	Rusian.1B	MS.1	27	1B	06-05-1987	27-5	T	MS	seamount	300	-25.2033	-100.831	34.5319	190.3	22.3661	12.8477	0.022163
Rusian	Rusian.1C	MS.1	28	1C	22-08-1972	28-8	T	MS	seamount	307.5	-25.2	-100.883	34.4997	187.701	22.3661	12.8477	0.022145
Rusian	Rusian.1D	MS.1	29	1D	01-07-1983	29-7	T	MS	seamount	300	-25.2	-100.93	34.5319	190.3	22.3661	12.8477	0.022107
Rusian	Rusian.2A	MS.2	30	2A	05-10-1984	30-10	T	MS	seamount	295	-25.9667	-100.603	34.5256	198.109	22.044	12.5777	0.02318
Rusian	Rusian.2B	MS.2	31	2B	06-05-1987	31-5	T	MS	seamount	340	-25.9967	-100.667	34.3912	186.16	22.044	12.5777	0.02318
Rusian	Rusian.2C	MS.2	32	2C	01-07-1983	32-7	T	MS	seamount	320	-25.92	-100.69	34.4363	191.361	22.044	12.5777	0.022977
Rusian	Rusian.3A	MS.3	33	3A	07-05-1987	33-5	T	MS	seamount	355	-25.1233	-99.68	34.3928	168.577	22.3335	12.3224	0.023615
Rusian	Rusian.3B	MS.3	34	3B	05-05-1987	34-5	T	MS	seamount	340	-25.12	-99.7133	34.402	173.49	22.3335	12.3224	0.023615
Rusian	Rusian.3C	MS.3	35	3C	01-07-1983	35-7	T	MS	seamount	400	-25.13	-99.75	34.8542	191.967	20.5735	12.419	0.023615
Rusian	Rusian.5A	MS.4	36	5A	08-05-1987	36-5	T	MS	seamount	277.5	-25.0817	-97.4267	34.5461	192.396	22.2498	11.8203	0.026299
Rusian	Rusian.5B	MS.4	37	5B	03-05-1987	37-5	T	MS	seamount	328	-25.0283	-97.44	34.4065	168.385	22.2498	11.8203	0.026299
Rusian	Rusian.5C	MS.4	38	5C	04-05-1987	38-5	T	MS	seamount	218	-25.0833	-97.465	34.9988	218.874	22.2498	11.8203	0.026351
Rusian	Rusian.5D	MS.4	39	5D	04-05-1987	39-5	T	MS	seamount	262.5	-25.0792	-97.47	34.6256	199.078	22.2498	11.8203	0.026299
Rusian	Rusian.5E	MS.4	40	5E	08-05-1987	40-5	T	MS	seamount	273.5	-25.08	-97.4833	34.5643	194.186	22.2498	11.8203	0.026299
Rusian	Rusian.5F	MS.4	41	5F	08-05-1987	41-5	T	MS	seamount	279.5	-25.0642	-97.4975	34.5378	191.473	22.2498	11.8203	0.026299
Rusian	Rusian.5G	MS.4	42	5G	04-05-1987	42-5	T	MS	seamount	255	-25.1211	-97.5033	34.674	202.668	22.2498	11.8203	0.026305
Rusian	Rusian.5H	MS.4	43	5H	01-07-1983	43-7	T	MS	seamount	300	-25.05	-97.53	34.4611	182.843	22.2498	11.8203	0.026274
Rusian	Rusian.5I	MS.4	44	5I	04-05-1987	44-5	T	MS	seamount	345	-25.0333	-97.5333	34.3989	160.357	22.2498	11.8203	0.026274
Rusian	Rusian.8	SGR.14	45	8	01-07-1983	45-7	T	SGR	seamount	400	-25	-88.39	34.4573	98.8019	20.6957	10.2812	0.083415
Rusian	Rusian.9	SGR.2	46	9	01-07-1983	46-7	T	SGR	seamount	158	-25.59	-86.9	34.7642	235.687	20.3307	10.2772	0.106194
Rusian	Rusian.10A	SGR.2	47	10A	29-04-1987	47-4	T	SGR	seamount	390	-25.65	-86.565	34.4759	89.0102	20.193	10.2743	0.10844
Rusian	Rusian.10B	SGR.2	48	10B	28-04-1987	48-4	T	SGR	seamount	397.5	-25.8	-86.5667	34.4723	94.5057	20.1176	10.2631	0.105434
Rusian	Rusian.10C	SGR.2	49	10C	11-10-1984	49-10	T	SGR	seamount	390	-25.7333	-86.5833	34.4759	89.0102	20.193	10.2743	0.107943
Rusian	Rusian.10D	SGR.2	50	10D	01-07-1983	50-7	T	SGR	seamount	390	-25.71	-86.65	34.4759	89.0102	20.193	10.2743	0.107943
Rusian	Rusian.12A	SGR.1	51	12A	29-09-1980	51-9	T	SGR	seamount	220	-25.6383	-85.35	34.338	193.05	19.9561	10.2129	0.116391
Rusian	Rusian.12B	SGR.1	52	12B	27-09-1980	52-9	T	SGR	seamount	235	-25.7383	-85.3683	34.339	175.074	19.9561	10.2129	0.116022
Rusian	Rusian.12C	SGR.1	53	12C	27-04-1987	53-4	T	SGR	seamount	160	-25.7	-85.4	34.6282	233.819	19.9561	10.2129	0.116022
Rusian	Rusian.12D	SGR.1	54	12D	27-04-1987	54-4	T	SGR	seamount	220	-25.7333	-85.4167	34.338	193.05	19.9561	10.2129	0.116022
Rusian	Rusian.12E	SGR.1	55	12E	26-04-1987	55-4	T	SGR	seamount	165	-25.6667	-85.4167	34.5971	231.714	19.9561	10.2129	0.116022
Rusian	Rusian.12F	SGR.1	56	12F	14-10-1980	56-10	T	SGR	seamount	180	-25.64	-85.4233	34.4952	223.566	19.9561	10.2129	0.114771
Rusian	Rusian.12G	SGR.1	57	12G	26-04-1987	57-4	T	SGR	seamount	162	-25.6417	-85.425	34.6162	233.007	19.9561	10.2129	0.114771
Rusian	Rusian.12H	SGR.1	58	12H	04-10-1980	58-10	T	SGR	seamount	175	-25.645	-85.4267	34.5283	226.72	19.9561	10.2129	0.114771
Rusian	Rusian.12I	SGR.1	59	12I	08-11-1979	59-11	T	SGR	seamount	225	-25.6667	-85.4333	34.3334	187.211	19.9561	10.2129	0.113752
Rusian	Rusian.12J	SGR.1	60	12J	04-10-1980	60-10	T	SGR	seamount	190	-25.62	-85.4383	34.4354	217.683	19.9561	10.2129	0.114771
Rusian	Rusian.12K	SGR.1	61	12K	01-07-1983	61-7	T	SGR	seamount	169	-25.65	-85.45	34.5702	229.837	19.9561	10.2129	0.114771
Rusian	Rusian.12L	SGR.1	62	12L	05-10-1980	62-10	T	SGR	seamount	190	-25.6433	-85.465	34.4354	217.683	19.9561	10.2129	0.114771
Rusian	Rusian.12M	SGR.1	63	12M	05-10-1980	63-10	T	SGR	seamount	215	-25.6317	-85.4683	34.3432	198.103	19.9561	10.2129	0.114771
Rusian	Rusian.12N	SGR.1	64	12N	26-04-1987	64-4	T	SGR	seamount	242.5	-25.575	-85.475	34.3521	165.282	19.9561	10.2129	0.115486
Rusian	Rusian.12O	SGR.1	65	12O	27-04-1987	65-4	T	SGR	seamount	255	-25.6083	-85.5333	34.3862	149.641	19.9561	10.2129	0.113902
Rusian	Rusian.13A	SGR.3	66	13A	01-07-1983	66-7	T	SGR	seamount	169	-24.7	-85.45	34.5411	222.496	20.0543	10.259	0.11714
Rusian	Rusian.13B	SGR.3	67	13B	16-10-1980	67-10	T	SGR	seamount	320	-24.7883	-85.4567	34.5018	81.0906	20.0238	10.2531	0.117335
Rusian	Rusian.15A	SGR.4	68	15A	25-04-1987	68-4	T	SGR	seamount	285	-25.8833	-84.3833	34.44	107.559	19.6661	10.0533	0.125719
Rusian	Rusian.15B	SGR.4	69	15B	26-04-1987	69-4	T	SGR	seamount	280	-25.9	-84.4	34.428	113.214	19.6661	10.0533	0.125719
Rusian	Rusian.16	SGR.11	70	16	17-10-1980	70-10	T	SGR	seamount	295	-23.9267	-84.7167	34.5213	78.7494	19.892	10.1465	0.126755
Rusian	Rusian.17R	SGR.13	71	17R	01-07-1983	71-7	T	SGR	seamount	300	-23.46	-83.33	34.5423	63.6931	19.7525	10.1522	0.143908
Rusian	Rusian.18R	NN.1	72	18R	01-07-1983	72-7	T	NN	seamount	300	-22.13	-81.3	34.6026	41.4692	19.7691	9.99762	0.17234
Rusian	Rusian.19	NN.1	73	19	01-07-1983	73-7	T	NN	seamount	300	-21.48	-81.66	34.6123	38.723	19.7875	10.0093	0.160362
Rusian	Rusian.22R	NN.1	74	22R	01-07-1983	74-7	T	NN	seamount	300	-21.71	-82.12	34.611	40.9674	19.8254	10.0424	0.155955
American	American.HD73	SGR.1	75	HD73	1964	75-4	T	SGR	seamount	220	-25.733	-85.416	34.338	193.05	19.9561	10.2129	0.116022
Desventuradas	Desventuradas.01.D01	D.1	76	D01	12-07-1966	76-7	T	D	Island	165	-26.333	-80.033	34.3101	191.237	18.4096	9.82058	0.181928
Desventuradas	Desventuradas.02.D02	D.1	77	D02	07-12-1965	77-12	T	D	Island	75	-26.267	-80.1	34.5961	246.287	18.4096	9.82058	0.177746
Desventuradas	Desventuradas.03.D03	D.1	78	D03	NA	NA	T	D	Island	75	-26.2847	-80.2528	34.6234	247.353	18.4766	9.80026	0.17496
Rusian	Rusian.12P	SGR.1	79	12P	15-10-1980	79-10	T	SGR	seamount	280	-25.6	-85.4483	34.4449	117.313	19.9561	10.2129	0.114771
SGR	SGR.01.SGR.01	SGR.10	80	SGR.01	18-10-1966	80-10	T	SGR	seamount	60	-24.5417	-83.3208	34.9111	243.486	19.6915	9.99037	0.144724
SGR	SGR.02.SGR.02	SGR.4	81	SGR.02	28-09-1980	81-9	T	SGR	seamount	210	-25.8617	-84.595	34.2959	200.619	19.6661	10.0533	0.12302
Selkirk	Selkirk.obis.SLK01	JF.1	82	SLK01	14-12-1965	82-12	T	JF	Island	170	-33.5717	-78.915	34.0934	184.397	16.8987	8.92135	0.189662
Selkirk	Selkirk.obis.SLK02	JF.1	83	SLK02	14-12-1965	83-12	T	JF	Island	170	-33.5817	-78.9167	34.0934	184.397	16.8987	8.92135	0.189014
Selkirk	Selkirk.obis.SLK03	JF.1	84	SLK03	14-12-1965	84-12	T	JF	Island	175	-33.65	-78.983	34.1109	177.563	16.8987	8.92135	0.193404
Apolo	Apolo.Rov.02	EI.1	85	Rov.02	09-01-2014	85-1	RV	EI	seamount	280	-27.2377	-109.486	34.8041	206.517	23.04	13.5697	0.022581
Apolo	Apolo.Rov.03	EI.1	86	Rov.03	09-01-2014	86-1	RV	EI	seamount	170	-27.2367	-109.487	35.4234	223.9	23.04	13.5697	0.022581
Pukao	Pukao.Dive.1	EI.2	87	Dive.1	16-03-2016	87-3	RV	EI	seamount	160	-26.9203	-110.266	35.5116	223.184	23.1181	13.5586	0.02182
Pukao	Pukao.Dive.3	EI.2	88	Dive.3.	16-03-2016	88-3	RV	EI	seamount	185	-26.924	-110.267	35.3697	220.572	23.1181	13.5586	0.02182
Pukao	Pukao.Dive.4	EI.2	89	Dive.4	16-03-2016	89-3	RV	EI	seamount	244	-26.9319	-110.276	35.012	209.915	23.1181	13.5586	0.02182
Pukao	Pukao.Dive.5	EI.2	90	Dive.5	16-03-2016	90-3	RV	EI	seamount	223	-26.9368	-110.265	35.1399	212.31	23.1181	13.5586	0.02182
Pukao	Pukao.Dive.6	EI.2	91	Dive.6	16-03-2016	91-3	RV	EI	seamount	163	-26.919	-110.269	35.4962	222.974	23.1181	13.5586	0.02182
Epic-Jamstec	Epic-Jamstec.3A1	D.2	92	SPG3A1	02-04-2019	92-4	A	D	Island	208	-26.4961	-79.818	34.345	106.457	20.8126	9.08784	0.174359
Epic-Jamstec	Epic-Jamstec.3A2	D.2	93	SPG3A2	02-04-2019	93-4	A	D	Island	211	-26.4571	-79.8907	34.3497	103.165	20.8126	9.08784	0.174496
Epic-Jamstec	Epic-Jamstec.4A1	SGR.7	94	SPG4A1	02-06-2019	94-6	A	SGR	seamount	530	-25.4206	-81.7566	34.4854	83.6076	21.3032	10.5466	0.153329
Epic-Jamstec	Epic-Jamstec.4A2	SGR.7	95	SPG4A2	02-06-2019	95-6	A	SGR	seamount	234	-25.4086	-81.7691	34.4679	123.772	21.3032	10.5466	0.154579
Epic-Jamstec	Epic-Jamstec.5A1	SGR.12	96	SPG5A1	02-09-2019	96-9	A	SGR	seamount	547	-25.5917	-89.1314	34.3942	152.208	22.6067	9.89594	0.063804
Epic-Jamstec	Epic-Jamstec.6A1	MS.5	97	SPG6A1	02-13-2019	97-13	A	MS	seamount	264	-26.1798	-102.974	34.8958	215.048	25.0157	13.485	0.021875
